# Supplementary material for: Primary charge separation in photoinduced multielectron storage systems. A dinuclear ruthenium(ii) species featuring a charge-separated state with a lifetime of 1.3 µs
Source: Royal Society of Chemistry journal article supplement (doi:10.1039/b302962j), 2003-01-01
Supplement: b302962j.doc [file b302962j.doc]

**Electronic Supplementary Information**

Primary processes in photoinduced multielectron storage systems. A dinuclear ruthenium(II) species featuring a charge-separated state with a lifetime of 1.3 s.

Claudio Chiorboli, Sandro Fracasso, Franco Scandola, Sebastiano Campagna, Scolastica Serroni, Rama Konduri and Frederick M. MacDonnell.


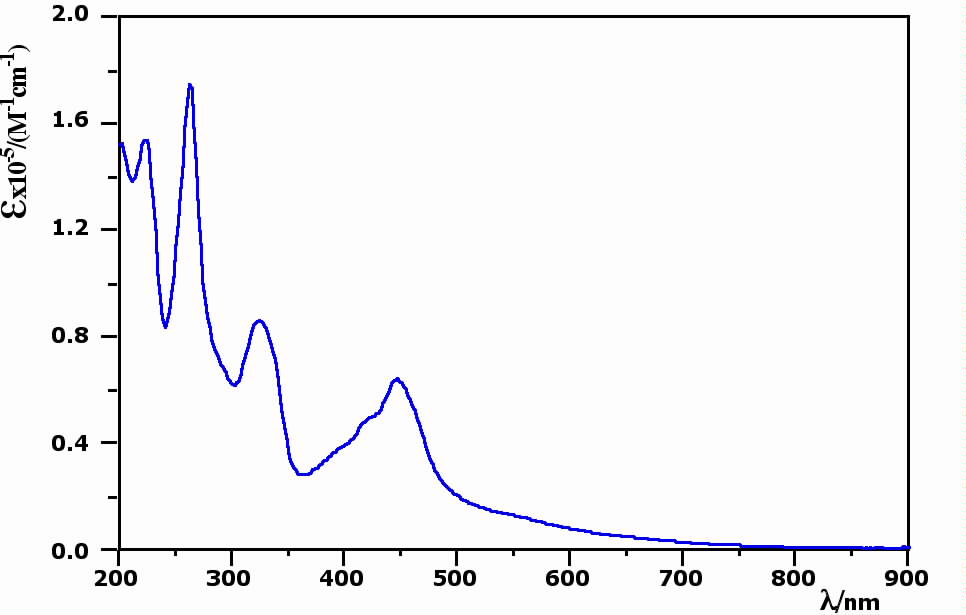


Figure S1. Absorption spectrum of **P** in acetonitrile solution
